# Supplementary material for: Identification of potential biomarkers to differentially diagnose solid pseudopapillary tumors and pancreatic malignancies via a gene regulatory network
Source: PubMed Central journal article supplement (PMC4650856; doi:10.1186/s12967-015-0718-3), 2015-11-14
Supplement: 12967_2015_718_MOESM1_ESM.pdf [file 12967_2015_718_MOESM1_ESM.pdf]

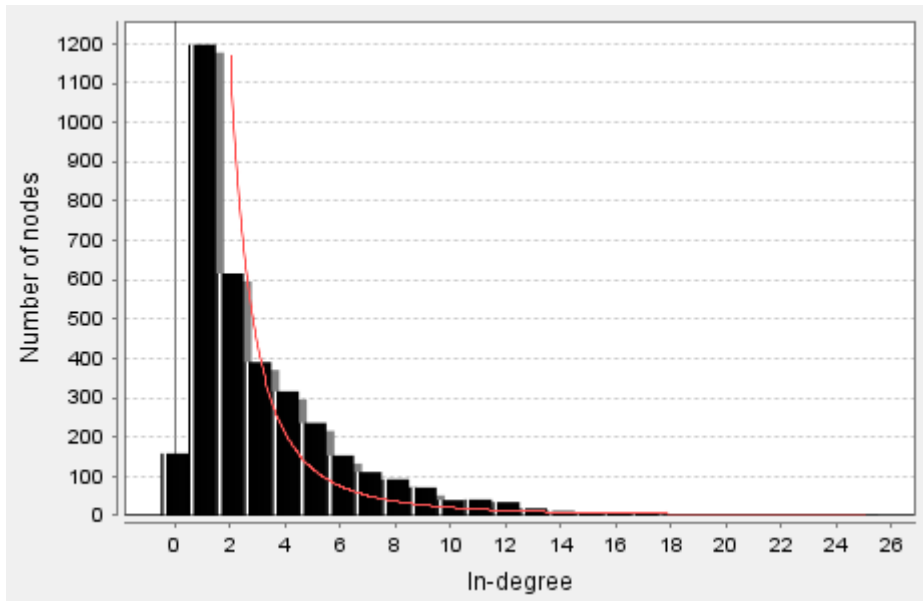

A

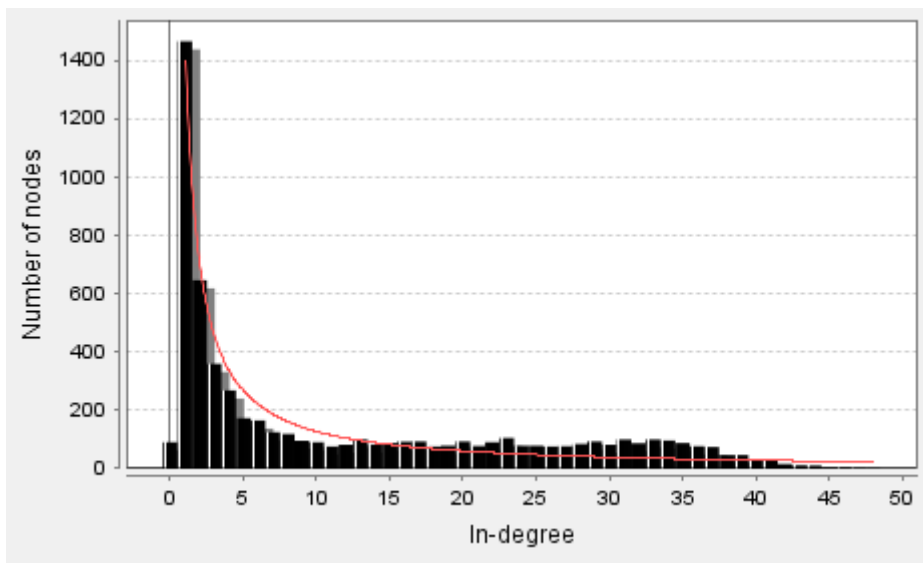

B
