# Supplementary material for: Identification of potential biomarkers to differentially diagnose solid pseudopapillary tumors and pancreatic malignancies via a gene regulatory network
Source: J Transl Med. 2015 Nov 14;13:361. doi: 10.1186/s12967-015-0718-3 (PMC4650856; doi:10.1186/s12967-015-0718-3)
Supplement: Supplementary file 4 — 10.1186/s12967-015-0718-3 Differentially expressed genes between SPN and non-neoplastic samples. Table S4 posts differentially expressed TFs with fold change and t-test p-value for each TF. Table S5 posts differentially expressed miRNAs with fold change and t-test p-value too for each miRNA. [file 12967_2015_718_MOESM4_ESM.xlsx]

## Sheet: Table S4
Table S4. Differentially expressed TFs for SPNs to Non-neoplastic samples
GeneName	SPN	Non-neoplastic samples	Fold change	Pvalue
JUN	9.63943	12.6085	0.127705	2.77066e-07
CDX2	6.32241	7.95873	0.321676	0.00559322
ZNF350	7.92904	6.544	2.61178	1.34608e-05
SOX8	9.9395	8.81986	2.17293	1.57879e-05
AR	8.09559	6.53741	2.94482	6.37308e-10
MEIS1	8.25622	11.256	0.125015	7.57618e-07
REL	7.40903	8.51673	0.464034	0.00874892
STAT4	7.48661	8.78779	0.405793	1.43507e-05
HAND1	8.50461	6.12257	5.21274	3.17e-05
PGR	8.18063	6.32074	3.62979	2.53742e-10
REST	7.73255	6.51575	2.3243	1.11451e-10
TFAP2C	9.21588	6.92054	4.9087	1.59303e-05
NFIL3	8.74284	10.4926	0.297348	0.00106234
SOX9	6.98408	10.4088	0.0931259	2.70542e-09
FOXC1	8.39223	11.1352	0.149373	0.000398319
MYC	8.28232	12.8026	0.0435758	3.68826e-09
TCF3	9.78047	8.3416	2.71109	2.32126e-05
SOX11	8.83509	6.34572	5.61532	2.27488e-11
SREBF1	8.69109	7.51365	2.26174	1.02059e-08
USF1	8.14766	6.87935	2.40879	2.90385e-06
TCF12	10.249	8.45832	3.45979	3.11568e-10
FOXA2	6.54452	8.37176	0.281803	2.70247e-08
PRDM1	8.88344	6.97532	3.7532	8.25334e-07
FOXA3	8.26466	11.1056	0.13957	2.66028e-08
NOTCH1	8.16802	10.0727	0.267069	1.40392e-09
HNF1B	9.27375	10.3675	0.468549	0.000905967
RUNX2	8.63564	6.31258	5.00394	2.73198e-16
HNF4G	6.44336	8.3676	0.263478	7.99118e-05
MAFG	8.53693	7.33139	2.30625	4.45923e-08
XBP1	10.2658	13.8701	0.0822271	1.28049e-09
SOX12	7.40897	6.39636	2.01756	2.10696e-07
HSF2	9.66337	8.63917	2.03384	5.10327e-05
HES1	8.36387	10.2582	0.268992	0.000961734
ONECUT1	6.40703	8.84093	0.185064	5.63118e-08
GATA1	9.12015	6.63844	5.58559	1.27729e-14
HAND2	8.22095	6.95578	2.40356	1.00574e-06
E2F3	9.70873	8.49559	2.31842	2.54609e-10
E2F1	7.72289	9.02681	0.405024	0.000548174
GLI2	8.21074	6.26797	3.84443	8.59585e-09
GLI3	9.0612	7.48298	2.98602	1.46809e-05
SOX4	11.555	10.0726	2.79402	2.23179e-10
GATA4	6.56085	8.6744	0.231078	9.43409e-07
EGR1	11.5997	12.9407	0.394749	0.00418998
MAF	9.97212	7.11213	7.26007	1.37738e-07
PBX3	8.54487	11.2398	0.154439	7.80011e-12
TCF7	7.45717	6.42157	2.04996	1.68619e-11
FLI1	10.5019	8.21784	4.87036	6.71693e-05
SMAD3	11.556	10.1673	2.61838	5.98858e-08

## Sheet: Table S5
Table S5. Differentially expressed miRNAs for SPNs to Non-neoplastic samples
GeneName	SPN	Non-neoplastic samples	Fold change	Pvalue
hsa-miR-182	7.20684	5.8243	2.60727	5.59511e-09
hsa-miR-135B	8.98607	6.35609	6.19016	2.29026e-05
hsa-miR-154	5.78084	6.98897	0.432829	0.000120839
hsa-miR-376C	6.6321	9.71929	0.117669	3.5566e-07
hsa-miR-133A	6.80588	5.6474	2.23221	0.00038413
hsa-miR-598	7.19768	6.16105	2.05142	1.04602e-06
hsa-miR-133B	8.61596	5.93375	6.41839	4.64155e-05
hsa-miR-487B	6.89937	7.99793	0.466983	0.0015519
hsa-miR-135A	9.03446	6.53483	5.65539	0.000169548
hsa-miR-192	6.02504	8.24848	0.21413	0.00149091
hsa-miR-483	7.57143	6.34181	2.34505	0.00753987
hsa-miR-153	7.53668	6.1732	2.57305	8.2299e-05
hsa-miR-381	5.94561	8.26002	0.201044	0.000691338
hsa-miR-301A	8.68301	6.85322	3.55485	0.00044403
hsa-miR-181A	8.25762	7.0627	2.28932	0.00135786
hsa-miR-200B	5.87964	8.32887	0.183109	0.00197057
hsa-miR-200C	5.74716	8.06535	0.200519	0.00471836
hsa-miR-139	8.24699	6.23762	4.02606	8.17615e-10
hsa-miR-376A	6.19206	7.54627	0.391149	1.52666e-08
hsa-miR-375	6.43857	11.3194	0.0339406	0.00901414
hsa-miR-194	6.02795	7.49515	0.361683	0.000690234
hsa-miR-429	5.80864	8.89444	0.117783	0.0045041
hsa-miR-210	9.07792	6.91404	4.48119	1.61594e-07
hsa-miR-204	9.34094	6.8426	5.65037	1.11448e-05
hsa-miR-4324	7.83611	6.54092	2.45409	0.000509538
hsa-miR-582	6.9514	5.78747	2.24066	2.92103e-10
hsa-miR-1	8.62793	5.98891	6.22908	0.000163573
hsa-miR-136	6.04588	7.94553	0.268008	0.000166588
hsa-miR-3907	7.56442	6.53609	2.03967	8.45231e-06
hsa-miR-181B	8.91344	7.35071	2.95413	0.0036522
hsa-miR-200A	5.80832	7.8806	0.237784	0.00188954
hsa-miR-127	5.91191	7.07894	0.445338	6.79029e-13
hsa-miR-215	6.09752	9.38685	0.102285	0.00050842
hsa-miR-377	5.96624	7.21676	0.420296	2.32321e-10
hsa-miR-484	8.00295	6.4603	2.9133	0.000396011
hsa-miR-128	8.28591	7.02089	2.4033	0.000778137
hsa-miR-499	7.16336	5.6745	2.80667	1.02371e-07
hsa-miR-455	6.32917	7.41513	0.471079	0.00017989
hsa-miR-141	5.94703	9.10345	0.112157	0.00444982
hsa-miR-183	8.17411	6.17406	4.00014	3.99411e-08
hsa-miR-4291	8.25092	6.95433	2.45647	0.00021159
